# Supplementary material for: Gastric Cancer-Derived Extracellular Vesicles (EVs) Promote Angiogenesis via Angiopoietin-2
Source: MDPI journal article supplement (doi:10.3390/cancers14122953), 2022-06-15
Supplement: s1 [file s1]

Article

# Gastric Cancer-Derived Extracellular Vesicles (EVs) Promote Angiogenesis via Angiopoietin-2

Talya Kalfon, Shelly Loewenstein, Fabian Gerstenhaber, Stav Leibou, Hen Geller, Osnat Sher, Eran Nizri and Guy Lahat

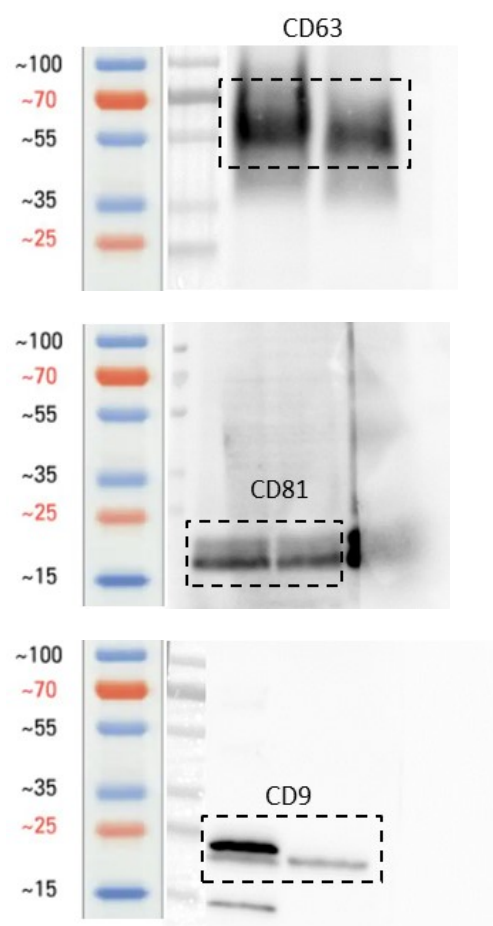

**Figure S1.** Uncropped western blots images corresponding to Figure 2.

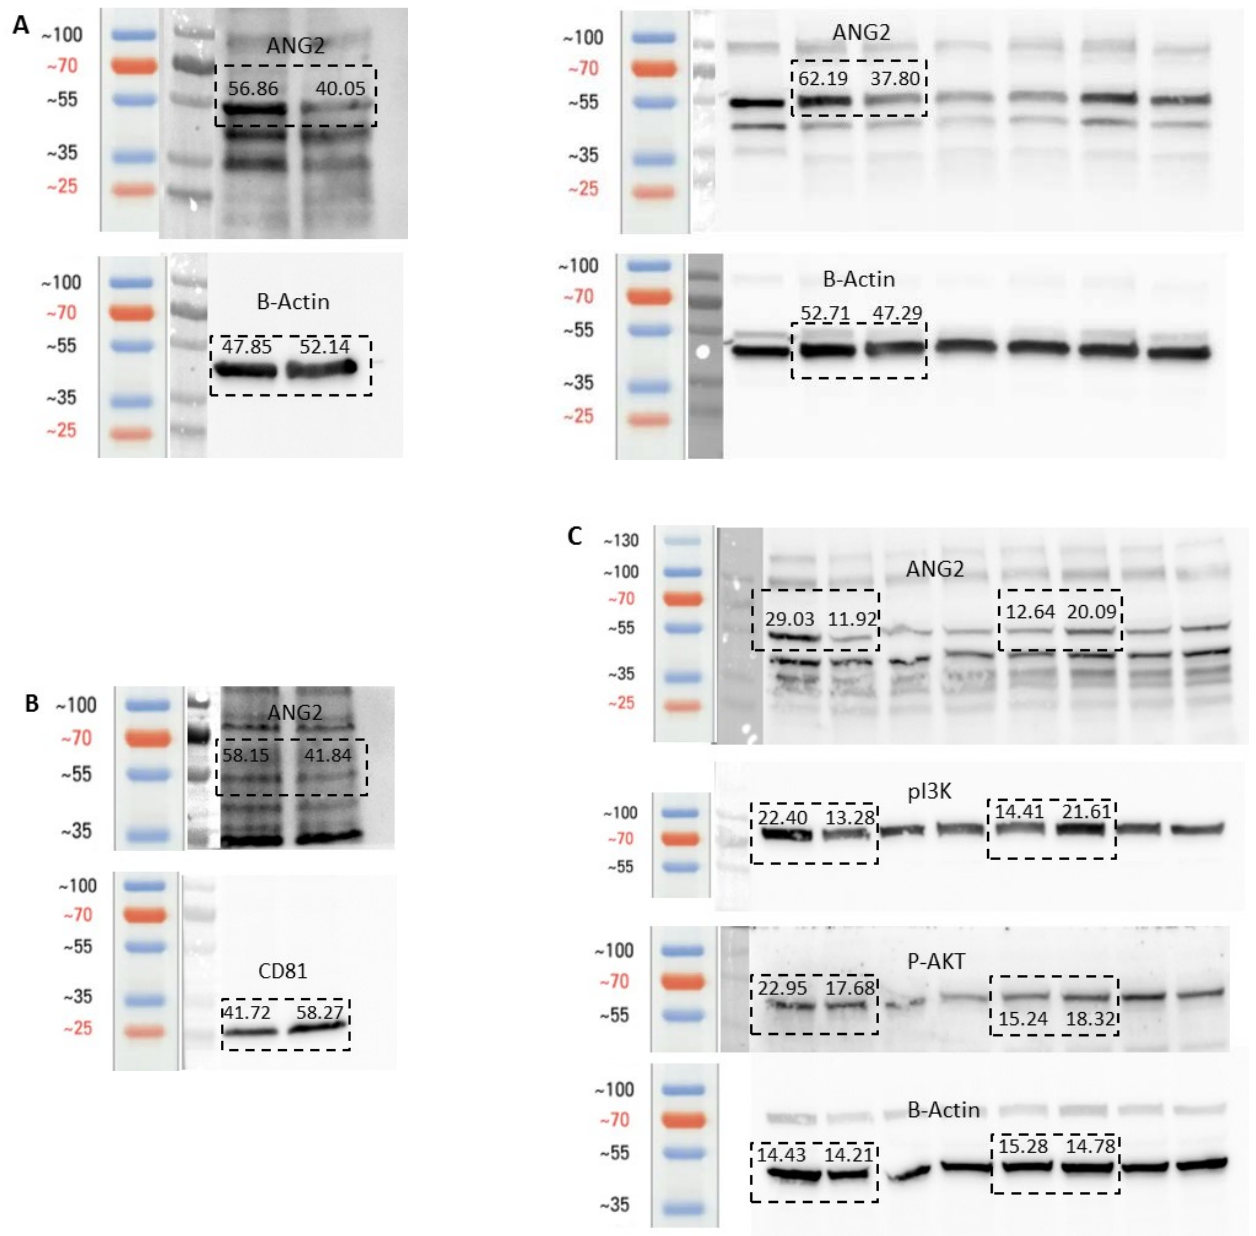

**Figure S2.** Uncropped western blots images corresponding to Figure 7.
